# Supplementary material
Source: Research Square preprint supplement (doi:10.21203/rs.3.rs-8080494/v1)
Supplement: Supplementary file 1 [file 7dabf753205ff16723f96aad.docx]

**Supplementary file 1. Interviewguide**

| **Questions to evaluate the process of using the monitor**  **Understanding of the instrument:** Have you had prior experience with similar instruments or tools? How did you view the monitor before using it?  **User-friendliness and accessibility:** Do you find the instrument easy to use? Are there aspects of the instrument that you find confusing or difficult to navigate? Are there specific features of the instrument that you find particularly good or bad?  **Integration into care routine:** How do you envision incorporating this instrument into your care routine? Do you foresee any challenges in using the instrument regularly? Are there adjustments you would suggest to make it more compatible with your tasks as a caregiver?  **Acceptance and comfort:** Do you feel comfortable using this instrument in your role as a caregiver? Do you have any concerns or hesitations about using this instrument?  **Support and training:** What kind of support or training do you think would be useful for caregivers using this instrument? Are there resources or materials that you believe should be provided to help ensure effective use of the instrument?  **Suggestions for improvement:** Based on your experience and feedback, are there any changes or improvements you would recommend for the instrument? Are there additional features or functionalities you would like to add?  **General impressions:** Is there anything else you would like to share about your experience with the instrument? |
| --- |
| **Questions to evaluate the process of peer visitation**  **General questions and questions specific to peer reviewers (PR) and teams (T)**  **General experiences:** How would you describe your overall experience as a PR/T during the peer review process? What were the most positive aspects of the peer review process from your perspective as PR/T? Have you encountered specific challenges during the peer review process?  **Preparation: How did you prepare for the peer review?** T: What preparatory steps did your team take to get ready for the peer review? PR: What (information) sources did you consult before reviewing the organization? Are there aspects of the preparation you would emphasize as crucial for a successful peer review?  **Conducting the peer review:** Can you describe how the actual peer review proceeded? T: How did the team/patients/family respond to the presence of the peer reviewers and the questions that were asked? PR: Were there specific methods or approaches you used during the peer review? How did you experience the interaction with the T/PR during the peer review?  **Evaluation process:** How did you experience the feedback and evaluation processes after the peer review? V: Are there areas for improvement that you can identify for the post-peer review evaluation process? PR: Are there specific points from the feedback that your team considers valuable for improvement?How effectively do you think the recommendations and feedback are communicated to the reviewed team? / How effectively did your team find the communication of recommendations and feedback from the peer reviewer?  **General recommendations:** Based on your experiences, what general recommendations would you make to improve the peer review process? Are there specific aspects that you believe warrant more attention in future visitations? |
